# Supplementary material for: Mouse Ribosomal RNA Genes Contain Multiple Differentially Regulated Variants
Source: PubMed Central journal article supplement (PMC2266999; doi:10.1371/journal.pone.0001843), 2008-03-26
Supplement: pone.0001843.s002.pdf [file pone.0001843.s002.pdf]

## Supplement Methods

### Variant-rDNA-specific PCR

No SNP was identified to distinguish v-rDNA I and II (i.e. their sequences were identical within the sequenced region of 5'-ETS). They were therefore always assayed together. For a given tissue sample, all PCRs were performed with the same cDNA preparation.

### Regular PCR

| v-rDNA | primers                                                                      | (1X) buffer                                                  | thermal cycle                                                   |
|--------|------------------------------------------------------------------------------|--------------------------------------------------------------|-----------------------------------------------------------------|
| I      | 5'-cca gct gtg gtt gag ggc <b>ca</b><br>5'-cgc tgg cag aac gag aag <b>aa</b> | 10 mM Tris-HCl, pH 8.8; 1.5 mM MgCl <sub>2</sub> ; 75 mM KCl | 94°C 5 m; {94°C, 30 s; 69°C, 30 s; 72°C, 40 s} x 35; 72°C, 7 m  |
| II     | Same as I                                                                    | Same as I                                                    | Same as I                                                       |
| III    | 5'-ccg agt <b>act</b> tct cct gtc tg<br>5'-gcc acc ggc cac atc cac <b>ca</b> | Same as I                                                    | 94°C 5 m; {94°C, 30 s; 66°C, 30 s; 72°C, 1.5 m} x 35; 72°C, 7 m |
| IV     | 5'-cca gct gtg gtt gag ggc <b>cg</b><br>5'-aag ctc ccc acg gga aag <b>cc</b> | Same as I                                                    | 94°C 5 m; {94°C, 30 s; 65°C, 30 s; 72°C, 1.2 m} x 35; 72°C, 7 m |
| V      | 5'-gtg act ttg cgt gtc aga <b>ct</b><br>5'-aca cac cac cgg cag acg <b>gg</b> | Same as I                                                    | 94°C 5 m; {94°C, 30 s; 68°C, 30 s; 72°C, 1.5 m} x 35; 72°C, 7 m |
| VI     | 5'-gtg act ttg cgt gtc aga <b>ct</b><br>5'-aca cgt gag ggc aca acc <b>gg</b> | Same as I                                                    | 94°C 5 m; {94°C, 30 s; 67°C, 30 s; 72°C, 40 s} x 40; 72°C, 7 m  |
| VII    | 5'-ctc ttg ttc tgt gtc tgt <b>at</b><br>5'-gat ccc tcc ccg aac tcg <b>gg</b> | 10 mM Tris-HCl, pH 8.3; 3.5 mM MgCl <sub>2</sub> ; 25 mM KCl | 94°C 5 m; {94°C, 30 s; 62°C, 30 s; 72°C, 1.5 s} x 35; 72°C, 7 m |
| 47S    | 5'-tgt gac aac tgg gcg ctg tg<br>5'-cac tga gaa aag tgc gcg cg               | Same as I                                                    | 94°C 5 m; {94°C, 30 s; 66°C, 30 s; 72°C, 40 s} x 35; 72°C, 7 m  |

### Real Time PCR

| v-rDNA | primers                                                                      | Reaction mix                                                                      | thermal cycle                                                          |
|--------|------------------------------------------------------------------------------|-----------------------------------------------------------------------------------|------------------------------------------------------------------------|
| I      | 5'-cca gct gtg gtt gag ggc <b>ca</b><br>5'-cgc tgg cag aac gag aag <b>aa</b> | 10 microliters master mix, 5 microliters of primers and 5 microliters of template | 95°C 10 m; {94°C, 10 s; 68°C, 15 s; 72°C, 40 s, read} x 35, 72°C, 10 m |
| II     | Same as I                                                                    | Same as I                                                                         | Same as I                                                              |
| III    | 5'-ccg agt <b>act</b> tct cct gtc tg<br>5'-gcc acc ggc cac atc cac <b>ca</b> | Same as I                                                                         | 95°C 10 m; {94°C, 10 s; 66°C, 15 s; 72°C, 80 s, read} x 45, 72°C, 10 m |
| IV     | 5'-cca gct gtg gtt gag ggc <b>cg</b><br>5'-aag ctc ccc acg gga aag <b>cc</b> | Same as I                                                                         | 95°C 10 m; {94°C, 10 s; 65°C, 15 s; 72°C, 40 s, read} x 45, 72°C, 10 m |
| V      | 5'-gtg act ttg cgt gtc aga <b>ct</b><br>5'-aca cac cac cgg cag acg <b>gg</b> | Same as I                                                                         | 95°C 10 m; {94°C, 10 s; 68°C, 15 s; 72°C, 40 s, read} x 35, 72°C, 10 m |
| VI     | 5'-gtg act ttg cgt gtc aga <b>ct</b><br>5'-aca cgt gag ggc aca acc <b>gg</b> | Same as I                                                                         | 95°C 10 m; {94°C, 10 s; 66°C, 15 s; 72°C, 40 s, read} x 45, 72°C, 10 m |
| VII    | 5'-ctc ttg ttc tgt gtc tgt <b>at</b><br>5'-gat ccc tcc ccg aac tcg <b>gg</b> | Same as I                                                                         | 95°C 10 m; {94°C, 10 s; 62°C, 15 s; 72°C, 40 s, read} x 45, 72°C, 10 m |
| 47S    | 5'-tgt gac aac tgg gcg ctg tg<br>5'-cac tga gaa aag tgc gcg cg               | Same as I                                                                         | 95°C 10 m; {94°C, 10 s; 66°C, 15 s; 72°C, 40 s, read} x 35, 72°C, 10 m |

The bold letters in primer sequence indicates the SNPs that are specific to the v-rDNA subtype.
